# Supplementary material
Source: HighWire-hosted journal article supplement (https://jnm.snmjournals.org/highwire/filestream/95194/field_highwire_adjunct_files/0/193532_Supplemental_Data.pdf)
Supplement: 193532_Supplemental_Data.pdf [file 193532_Supplemental_Data.pdf]

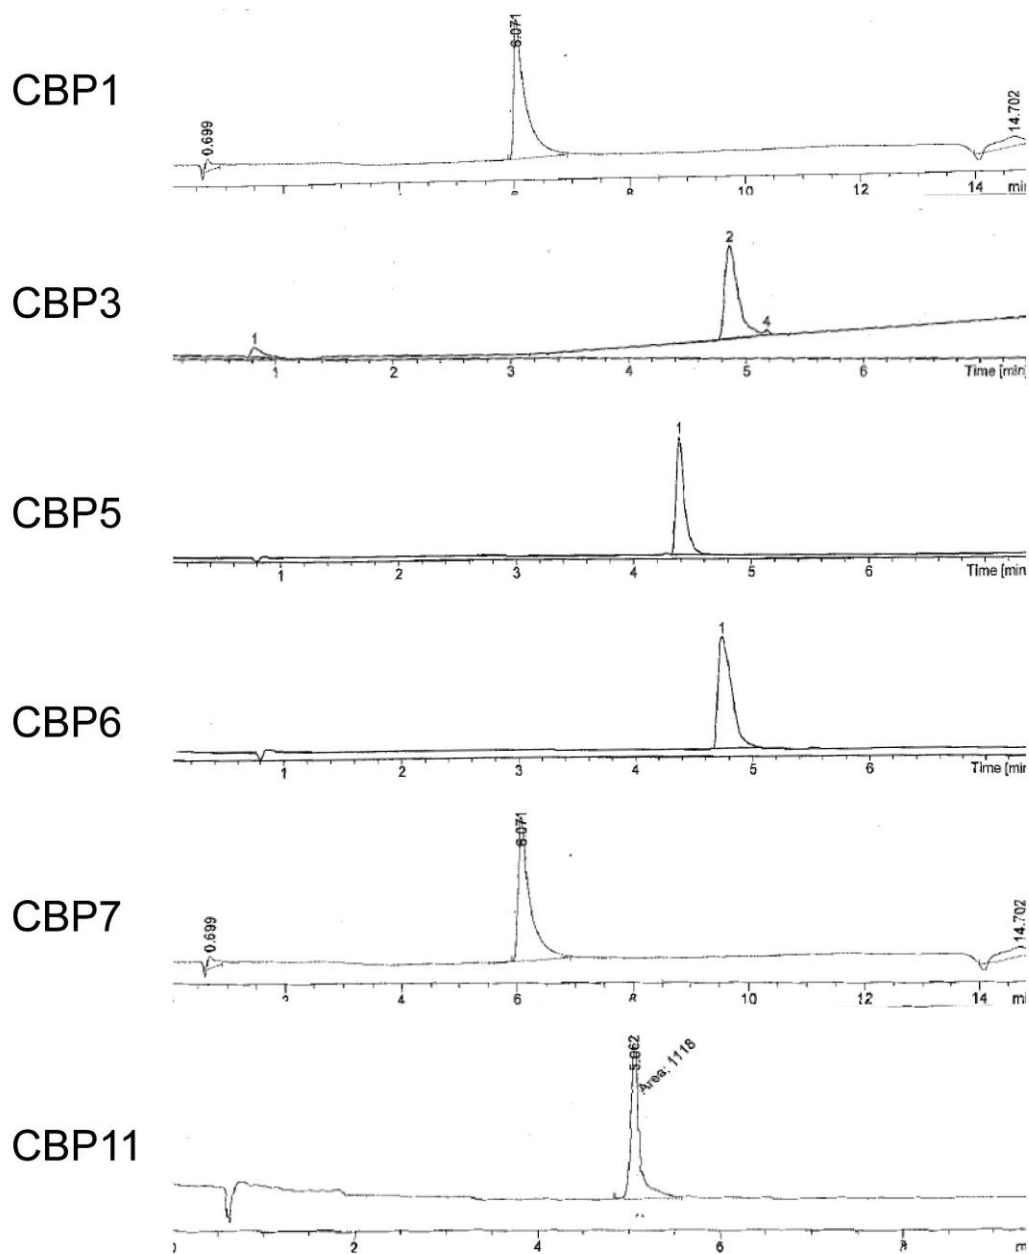

**Supplemental Figure 1.** HPLC spectrum (UV=280 nm) of the precursors of CBP1, CBP3, CBP5, CBP6, CBP7 and CBP11

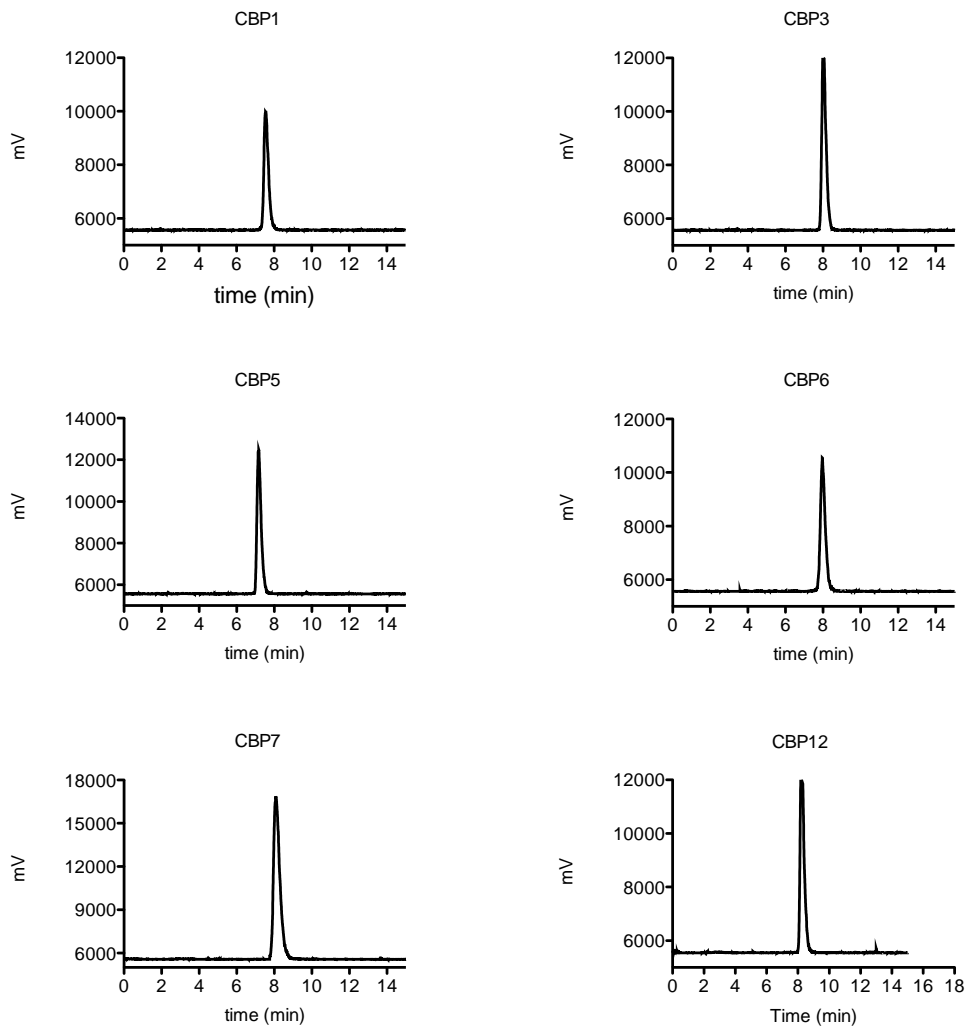

**Supplemental Figure 2.** Radio-HPLC spectra of CBP1, CBP3, CBP5, CBP6, CBP7 and CBP11 showing purity.

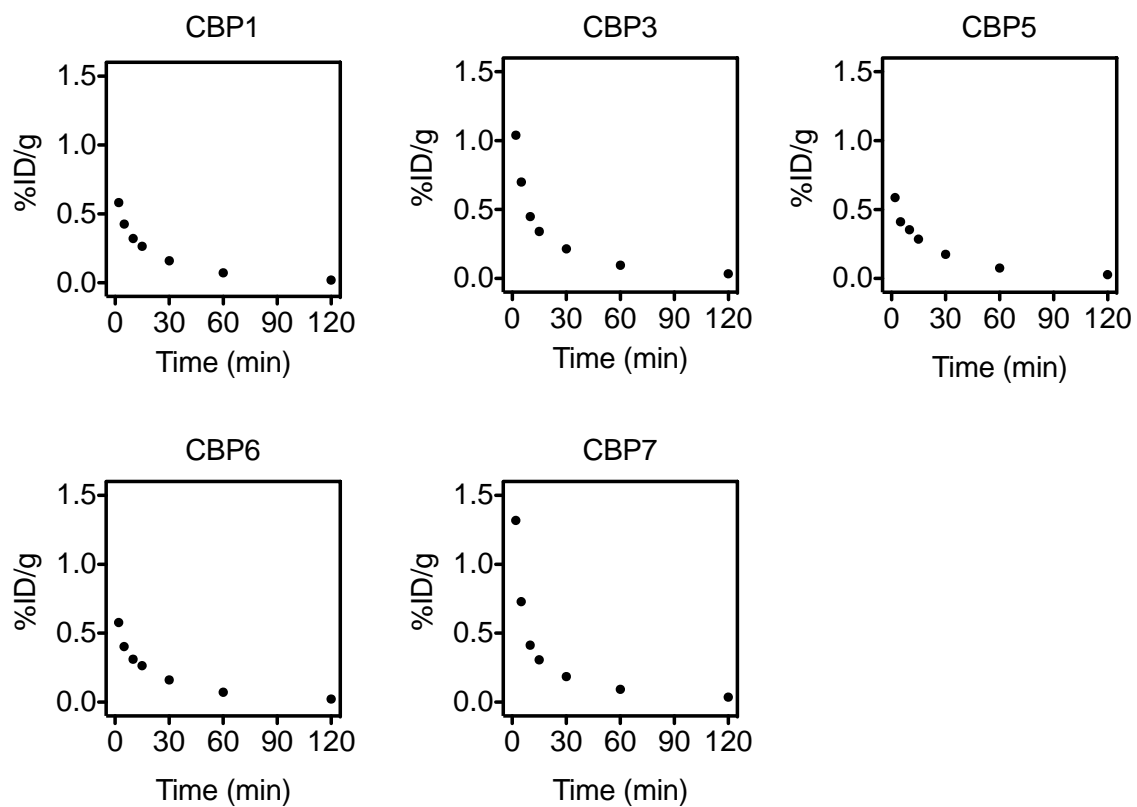

**Supplemental Figure 3.** Pharmacokinetic data showing blood clearance of the probes. Symbols indicate total copper-64 activity in the blood.

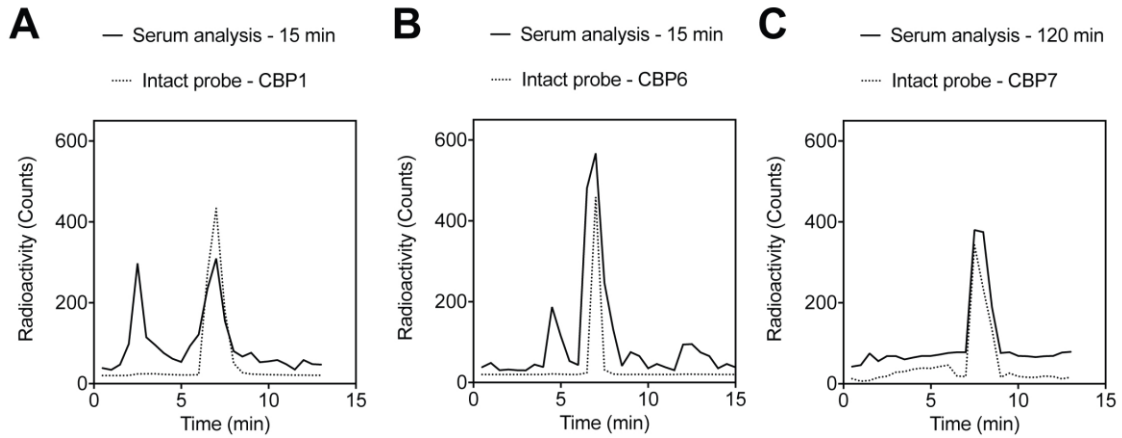

**Supplemental Figure 4.** **A.** Representative radio-HPLC traces of intact CBP1 immediately isolated from serum (dashed line) and of serum collected 15 min post CBP1 injection (solid line), **B.** of intact CBP6 immediately isolated from serum (dashed line) and of serum collected 15 min post CBP6 injection (solid line), **C.** of intact CBP7 immediately isolated from serum (dashed line) and of serum collected 120 min post CBP7 injection (solid line).

### BM - CBP7

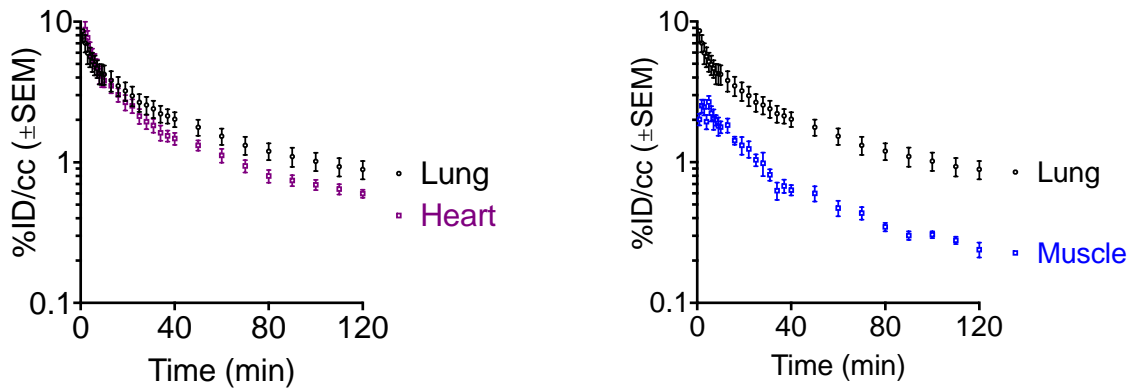

### Sham - CBP7

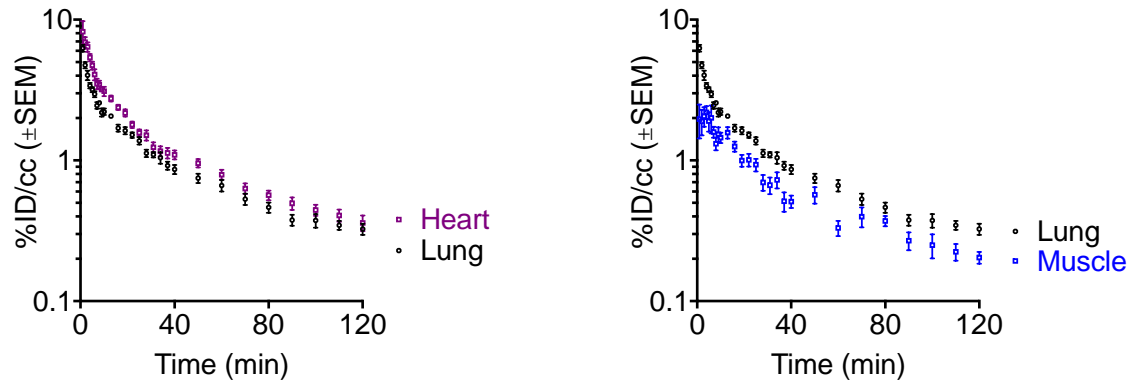

**Supplemental Figure 5.** Time-activity curves of lung and heart and lung and muscle from dynamic PET imaging in sham and BM-treated mice after CBP7 injection.

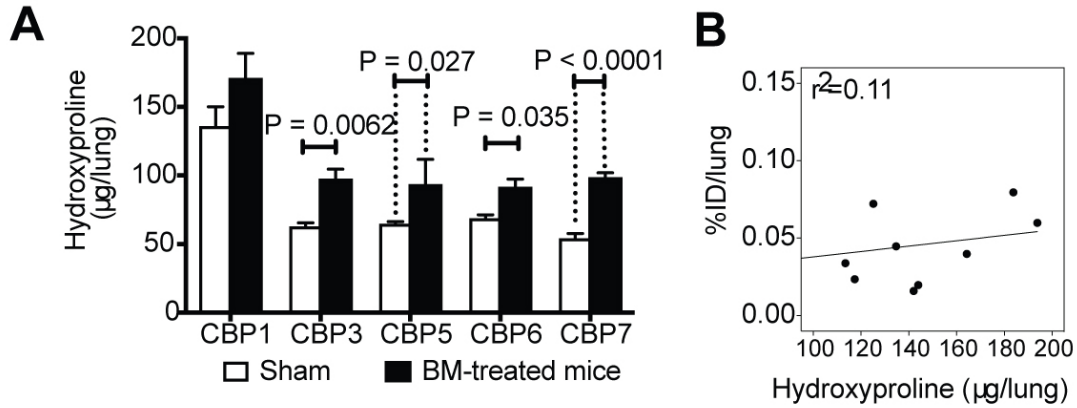

**Supplemental Figure 6. A.** Hydroxyproline analysis of *ex vivo* harvested lung tissue from sham and bleomycin (BM)-treated animals (2 weeks after instillation of bleomycin). **B.** Correlation between hydroxyproline content as a measure of total lung collagen and %ID/lung in sham and bleomycin-treated mice, 2 weeks after instillation of bleomycin or vehicle and 150 min after CBP1 injection.

**Supplemental Table 1.** LC-MS Species Identification of CBP1, CBP3, CBP5 and CBP6.

| Specie                 | Chemical formula   | Ion         |           |
|------------------------|--------------------|-------------|-----------|
|                        |                    | m/2<br>calc | m/2<br>th |
| cPep(1)                | C99H124N26O23S2    | 1056.1      | 1056.5    |
| (tBu)3NODAGA-cPep(1)   | C126H171N29O30S2   | 1319        | 1318      |
| NODAGA-cPep(1)         | C114H147N29O30S2   | 1234.9      | 1234.6    |
| 63/65Cu-NODAGA-cPep(1) | C114H145CuN29O30S2 | 1265.6      | 1265.5    |
| cPep(3)                | C98H122N26O23S2    | 1049.2      | 1049.2    |
| (tBu)3NODAGA-cPep(3)   | C125H169N29O30S2   | 1312        | 1311.3    |
| NODAGA-cPep(3)         | C113H145N29O30S2   | 1227.9      | 1227.1    |
| 63/65Cu-NODAGA-cPep(3) | C113H143CuN29O30S2 | 1258.6      | 1258.1    |
| cPep(5)                | C99H125N29O22S2    | 1069.7      | 1069.6    |
| (tBu)3NODAGA-cPep(5)   | C126H172N32O29S2   | 1332.5      | 1331.7    |
| NODAGA-cPep(5)         | C114H148N32O29S2   | 1248.4      | 1247.5    |
| 63/65Cu-NODAGA-cPep(5) | C114H146CuN32O29S2 | 1279.1      | 1279.1    |
| cPep(6)                | C101H128N26O22S2   | 1062.2      | 1061.6    |
| (tBu)3NODAGA-cPep(6)   | C128H175N29O29S2   | 1325        | 1325.3    |
| NODAGA-cPep(6)         | C116H151N29O29S2   | 1240.8      | 1239.7    |
| 63/65Cu-NODAGA-cPep(6) | C116H149CuN29O29S2 | 1271.5      | 1271.6    |

**Supplemental Table 2.** LC-MS Species Identification of CBP7 and CBP11.

| Specie                  | Chemical formula    | Ion         |           |             |           |
|-------------------------|---------------------|-------------|-----------|-------------|-----------|
|                         |                     | m/3<br>calc | m/3<br>th | m/4<br>calc | m/4<br>th |
| NODAGA-cPep(7)          | C157H213N37O43S2    | ND*         | ND        | 843.8       | 843.4     |
| 63/65Cu-NODAGA-cPep(7)  | C157H207Cu3N37O43S2 | 1186        | 1186.2    | ND          | ND        |
| NODAGA-cPep(11)         | C157H213N37O43S2    | ND          | ND        | 843.8       | 843.5     |
| 63/65Cu-NODAGA-cPep(11) | C157H207Cu3N37O43S2 | 1186        | 1186.3    | ND          | ND        |

\*ND (non detectable)



**Supplemental Table 3.**  $K_d$  Values ( $\mu\text{M}$ ) determined for collagen-binding probes through a rat tail collagen binding assay.

|       | $K_d$ ( $\mu\text{M}$ ) |
|-------|-------------------------|
| CBP1  | $1.6 \pm 1.1$           |
| CBP3  | $4.4 \pm 1.0$           |
| CBP5  | $7.7 \pm 5.2$           |
| CBP6  | $14.6 \pm 5.8$          |
| CBP7  | $2.4 \pm 1.5$           |
| CBP11 | 100                     |

**Supplemental Table 4.** Elimination half-life of the probes determined from blood samples in healthy rats.

|       | Half-life of the probe<br>in rat (min) |
|-------|----------------------------------------|
| CBP1  | 20.4                                   |
| CBP3  | 23.4                                   |
| CBP5  | 18.5                                   |
| CBP6  | 20.2                                   |
| CBP7  | 20.0                                   |
| CBP11 | 21.3                                   |

**Supplemental Table 5.** Tissue biodistribution of CBP1, 150 min post injection in sham and bleomycin-treated mice. Values are expressed in % ID/g  $\pm$  SEM.

| <b>CBP1</b>   | Sham (n=3) |            | bleomycin-treated mice(n=3) |            |
|---------------|------------|------------|-----------------------------|------------|
| blood         | 0.09       | $\pm$ 0.02 | 0.10                        | $\pm$ 0.02 |
| lungs         | 0.38       | $\pm$ 0.06 | 0.59                        | $\pm$ 0.20 |
| heart         | 0.08       | $\pm$ 0.01 | 0.08                        | $\pm$ 0.01 |
| liver         | 0.71       | $\pm$ 0.01 | 1.07                        | $\pm$ 0.28 |
| muscle        | 0.12       | $\pm$ 0.06 | 0.26                        | $\pm$ 0.16 |
| spleen        | 0.14       | $\pm$ 0.01 | 0.31                        | $\pm$ 0.18 |
| sm. intestine | 0.38       | $\pm$ 0.08 | 2.02                        | $\pm$ 1.68 |
| kidney        | 13.79      | $\pm$ 1.11 | 13.51                       | $\pm$ 1.76 |
| bone          | 0.14       | $\pm$ 0.03 | 0.30                        | $\pm$ 0.17 |

**Supplemental Table 6.** Tissue biodistribution of CBP3, 150 min post injection in sham and bleomycin-treated mice. Values are expressed in % ID/g  $\pm$  SEM.

| <b>CBP3</b>   | Sham (n=4) |            | bleomycin-treated mice (n=5) |            |
|---------------|------------|------------|------------------------------|------------|
| blood         | 0.17       | $\pm$ 0.02 | 0.49                         | $\pm$ 0.31 |
| lungs         | 0.36       | $\pm$ 0.01 | 0.70                         | $\pm$ 0.08 |
| heart         | 0.10       | $\pm$ 0.00 | 0.16                         | $\pm$ 0.04 |
| liver         | 2.01       | $\pm$ 0.07 | 2.57                         | $\pm$ 0.24 |
| muscle        | 0.05       | $\pm$ 0.00 | 0.14                         | $\pm$ 0.04 |
| spleen        | 0.21       | $\pm$ 0.02 | 0.97                         | $\pm$ 0.24 |
| sm. intestine | 0.69       | $\pm$ 0.09 | 1.04                         | $\pm$ 0.35 |
| kidney        | 13.02      | $\pm$ 0.49 | 14.59                        | $\pm$ 1.56 |
| bone          | 0.13       | $\pm$ 0.01 | 0.29                         | $\pm$ 0.13 |

**Supplemental Table 7.** Tissue biodistribution of CBP5, 150 min post injection in sham and bleomycin-treated mice. Values are expressed in % ID/g  $\pm$  SEM.

| <b>CBP5</b>   | Sham (n=4) |            | bleomycin-treated mice (n=6) |            |
|---------------|------------|------------|------------------------------|------------|
| blood         | 0.11       | $\pm$ 0.02 | 0.12                         | $\pm$ 0.03 |
| lungs         | 0.30       | $\pm$ 0.06 | 0.45                         | $\pm$ 0.13 |
| heart         | 0.08       | $\pm$ 0.01 | 0.09                         | $\pm$ 0.01 |
| liver         | 2.63       | $\pm$ 0.15 | 3.84                         | $\pm$ 0.77 |
| muscle        | 0.47       | $\pm$ 0.41 | 0.03                         | $\pm$ 0.01 |
| spleen        | 0.81       | $\pm$ 0.42 | 1.59                         | $\pm$ 0.55 |
| sm. intestine | 0.51       | $\pm$ 0.10 | 0.43                         | $\pm$ 0.09 |
| kidney        | 30.49      | $\pm$ 2.01 | 18.37                        | $\pm$ 1.91 |
| bone          | 0.70       | $\pm$ 0.34 | 0.49                         | $\pm$ 0.24 |

**Supplemental Table 8.** Tissue biodistribution of CBP6, 150 min post injection in sham and bleomycin-treated mice. Values are expressed in % ID/g  $\pm$  SEM.

| <b>CBP6</b>   | Sham (n=3)       | bleomycin-treated mice (n=6) |
|---------------|------------------|------------------------------|
| blood         | 0.19 $\pm$ 0.02  | 0.28 $\pm$ 0.10              |
| lungs         | 0.47 $\pm$ 0.09  | 0.54 $\pm$ 0.07              |
| heart         | 0.15 $\pm$ 0.02  | 0.16 $\pm$ 0.02              |
| liver         | 2.64 $\pm$ 0.16  | 2.50 $\pm$ 0.22              |
| muscle        | 0.96 $\pm$ 0.70  | 0.14 $\pm$ 0.07              |
| spleen        | 1.86 $\pm$ 0.70  | 0.78 $\pm$ 0.08              |
| sm. intestine | 1.17 $\pm$ 0.20  | 0.94 $\pm$ 0.16              |
| kidney        | 21.07 $\pm$ 4.04 | 14.01 $\pm$ 0.73             |
| bone          | 0.89 $\pm$ 0.63  | 0.37 $\pm$ 0.05              |

**Supplemental Table 9.** Biodistribution in sham and bleomycin-treated mice at 150 min post injection) for CBP7. Uncertainty is represented as the as SEM.

| <b>CBP7</b>   | Sham (n=7) |        | bleomycin-treated mice (n=7) |        |
|---------------|------------|--------|------------------------------|--------|
| blood         | 0.31       | ± 0.04 | 0.63                         | ± 0.06 |
| lungs         | 0.42       | ± 0.07 | 1.37                         | ± 0.36 |
| heart         | 0.22       | ± 0.04 | 0.41                         | ± 0.07 |
| liver         | 2.32       | ± 0.54 | 2.82                         | ± 0.74 |
| muscle        | 0.09       | ± 0.02 | 0.18                         | ± 0.03 |
| spleen        | 1.06       | ± 0.25 | 1.94                         | ± 0.61 |
| sm. intestine | 0.91       | ± 0.22 | 0.88                         | ± 0.08 |
| kidney        | 65.18      | ± 4.91 | 56.89                        | ± 6.40 |
| bone          | 0.25       | ± 0.05 | 0.50                         | ± 0.04 |

**Supplemental Table 10.** Biodistribution in sham and bleomycin-treated mice at 150 min post injection for CBP11. Uncertainty is represented as the as SEM.

| <b>CBP11</b>  | Sham (n=4) |   |      | bleomycin-treated mice(n=4) |   |      |
|---------------|------------|---|------|-----------------------------|---|------|
| blood         | 0.22       | ± | 0.02 | 0.37                        | ± | 0.18 |
| lungs         | 0.34       | ± | 0.03 | 0.44                        | ± | 0.05 |
| heart         | 0.14       | ± | 0.01 | 0.17                        | ± | 0.04 |
| liver         | 1.30       | ± | 0.09 | 0.95                        | ± | 0.07 |
| muscle        | 0.18       | ± | 0.10 | 0.10                        | ± | 0.03 |
| spleen        | 0.41       | ± | 0.01 | 0.48                        | ± | 0.06 |
| sm. intestine | 0.58       | ± | 0.06 | 0.93                        | ± | 0.18 |
| kidney        | 57.68      | ± | 4.20 | 51.73                       | ± | 4.20 |
| bone          | 0.29       | ± | 0.14 | 0.22                        | ± | 0.06 |
